# Supplementary material for: The standardization and application of an external (in air) particle induced gamma emission (PIGE) method for the rapid and non-destructive quantification of light elements at major to trace concentrations in coal, bottom ash and coke samples
Source: Royal Society of Chemistry journal article supplement (doi:10.1039/d1ja00309g), 2021-12-08
Supplement: d1ja00309g1.pdf [file d1ja00309g1.pdf]

### Supplementary Information

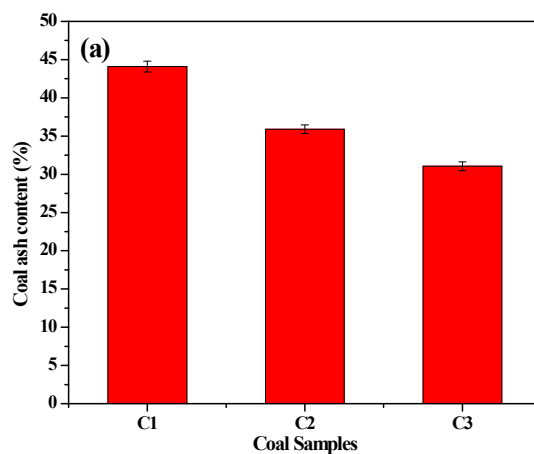

**Fig. 1** Calculated ash contents of three coal samples in terms of combined concentrations of oxides of Na, Mg, Al and Si

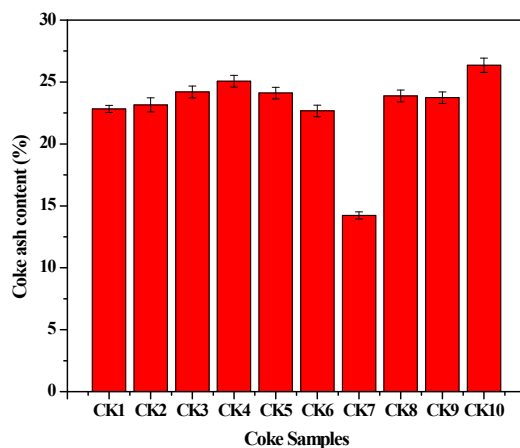

**Fig. 2** Determination of ash contents in terms of combined concentrations of oxides of Na, Mg, Al and Si for ten coke samples (CK1 – CK10)
